# Supplementary material for: Ultra-Processed Food Intakes Are Associated with Depression in the General Population: The Korea National Health and Nutrition Examination Survey
Source: MDPI journal article supplement (doi:10.3390/nu15092169), 2023-05-01
Supplement: s1 [file s1]

**Supplemental Table S1.** Means of Nutrients of the Males according to Ultra-processed Food Intakes.

|                        | Male (n=4,200)     |                  |                  |                  |          |                         |                   |                     |                      |          |
|------------------------|--------------------|------------------|------------------|------------------|----------|-------------------------|-------------------|---------------------|----------------------|----------|
|                        | Depression (n=133) |                  |                  |                  |          | No depression (n=4,067) |                   |                     |                      |          |
|                        | Q1                 | Q2               | Q3               | Q4               | <i>p</i> | Q1                      | Q2                | Q3                  | Q4                   | <i>p</i> |
|                        | n=28<br>(13.32%)   | n=27<br>(23.94%) | n=32<br>(25.30%) | n=46<br>(37.44%) |          | n=891<br>(18.55%)       | n=943<br>(22.81%) | n=1,069<br>(26.30%) | n=1,164<br>(32.34 %) |          |
| UPF energy, kcal       | 121.78±28.97       | 328.52±38.95     | 626.28±39.85     | 1297.4±123.37    | <0.001   | 92.63±3.05              | 333.48±5.96       | 700.29±9.14         | 1349.48±19.76        | <0.001   |
| Total energy, kcal/day | 2324.86±212.16     | 2236.45±180.04   | 2195.38±125.61   | 2160.93±123.76   | 0.526    | 1994.07±27.57           | 2191.61±32.67     | 2404.52±28.82       | 2549.94±29.81        | <0.001   |
| Carbohydrate, g        | 339.71±15.50       | 352.66±36.95     | 308.04±15.83     | 275.57±17.16     | 0.007    | 321.86±4.67             | 327.69±4.41       | 339.13±4.22         | 326.56±4.18          | 0.366    |
| Sugar, g               | 48.68±5.53         | 69.92±11.74      | 54.87±7.34       | 47.97±4.85       | 0.212    | 49.61±1.36              | 61.9±1.53         | 69.62±1.56          | 71.02±1.49           | <0.001   |
| Protein, g             | 87.78±9.37         | 89.18±7.62       | 80.58±7.03       | 62.69±4.56       | <0.001   | 79.49±1.57              | 85.65±1.67        | 89.46±1.47          | 83.48±1.24           | 0.0761   |
| Fat, g                 | 65.42±16.95        | 50.48±6.55       | 54.11±6.28       | 42.5±3.54        | 0.140    | 41.2±1.37               | 53.33±1.81        | 59.24±1.29          | 58.61±1.15           | <0.001   |
| Saturated fat, g       | 21.29±5.65         | 14.41±1.73       | 17.62±2.44       | 15.33±1.43       | 0.453    | 12.09±0.48              | 16.62±0.6         | 18.87±0.43          | 20.2±0.43            | <0.001   |
| Dietary sodium, mg     | 4064.16±487.84     | 3586.20±428.98   | 3722.27±429.98   | 3869.01±319.36   | 0.980    | 3704.88±81.09           | 3872.61±77.63     | 4229.08±69.80       | 4285.98±73.34        | <0.001   |
| Food Groups            |                    |                  |                  |                  |          |                         |                   |                     |                      |          |
| Vegetables, g          | 364.59±39.84       | 324.27±50.79     | 302.09±43.08     | 232.78±22.12     | 0.004    | 395.08±8.71             | 354.24±7.86       | 343.78±7.19         | 277.13±6.13          | <0.001   |
| Fruits, g              | 132.85±37.28       | 364.43±61.98     | 161.62±52.11     | 80.29±25.93      | 0.033    | 290.38±14.79            | 251.57±12.29      | 226.55±11.96        | 167.54±9.97          | <0.001   |

mean±SE; BMI, body mass index

**Supplemental Table S2.** Means of Nutrients of the Females according to Ultra-processed Food Intakes.

|                        | Female (n=5,263)   |                  |                  |                  |          |                         |                     |                     |                     |          |
|------------------------|--------------------|------------------|------------------|------------------|----------|-------------------------|---------------------|---------------------|---------------------|----------|
|                        | Depression (n=312) |                  |                  |                  |          | No depression (n=4,951) |                     |                     |                     |          |
|                        | Q1                 | Q2               | Q3               | Q4               | <i>p</i> | Q1                      | Q2                  | Q3                  | Q4                  | <i>p</i> |
|                        | n=73<br>(21.60%)   | n=72<br>(21.13%) | n=76<br>(23.84%) | n=91<br>(33.44%) |          | n=1,357<br>(24.39%)     | n=1,317<br>(25.27%) | n=1,193<br>(25.41%) | n=1,084<br>(24.93%) |          |
| UPF energy, kcal       | 52.20±6.90         | 250.22±17.64     | 490.56±29.67     | 1087.57±75.72    | <0.001   | 64.70±1.79              | 251.58±3.67         | 512.69±7.08         | 968.80±16.91        | <0.001   |
| Total energy, kcal/day | 1416.19±73.99      | 1638.29±86.36    | 1649.22±93.99    | 1918.79±107.12   | <0.001   | 1554.41±18.59           | 1687.93±21.20       | 1768.84±21.80       | 1824.29±26.35       | <0.001   |
| Carbohydrate, g        | 261.39±18.01       | 262.87±12.74     | 254.46±13.99     | 269.49±14.31     | 0.763    | 264.05±3.35             | 267.32±3.60         | 263.10±3.20         | 264.21±3.54         | 0.796    |
| Sugar, g               | 45.93±5.45         | 56.17±5.90       | 52.53±4.11       | 72.82±6.57       | 0.003    | 47.43±1.16              | 57.60±1.41          | 62.09±1.28          | 63.75±1.34          | <0.001   |
| Protein, g             | 46.97±2.05         | 62.02±4.87       | 55.73±4.40       | 58.74±3.51       | 0.070    | 57.29±1.00              | 63.21±1.06          | 65.50±1.02          | 59.04±1.06          | 0.100    |
| Fat, g                 | 19.75±1.63         | 35.64±3.43       | 40.27±3.67       | 50.59±4.11       | <0.001   | 29.55±0.79              | 39.01±0.95          | 45.74±0.97          | 46.61±1.15          | <0.001   |
| Saturated fat, g       | 5.98±0.65          | 10.49±1.12       | 13.68±1.20       | 18.42±1.64       | <0.001   | 8.50±0.26               | 12.13±0.34          | 14.76±0.33          | 16.94±0.48          | <0.001   |
| Dietary sodium, mg     | 2369.31±145.97     | 2713.06±224.30   | 2876.60±219.11   | 2983.51±201.36   | 0.022    | 2568.35±50.91           | 2859.76±57.69       | 3063.47±63.05       | 3199.4±64.24        | <0.001   |
| Food Groups            |                    |                  |                  |                  |          |                         |                     |                     |                     |          |
| Vegetables, g          | 318.83±30.19       | 238.82±27.97     | 199.15±16.31     | 201.94±22.05     | 0.002    | 308.67±6.26             | 285.24±5.53         | 256.78±5.68         | 203.54±5.74         | <0.001   |
| Fruits, g              | 283.40±49.16       | 301.14±61.59     | 160.07±24.65     | 149.21±23.11     | 0.004    | 292.95±10.83            | 266.52±13.62        | 226.93±10.42        | 181.77±8.60         | <0.001   |

mean±SE; BMI, body mass index
